# Supplementary material for: Burden of Influenza and Respiratory Syncytial Viruses in Suspected COVID-19 Patients: A Cross-Sectional and Meta-Analysis Study
Source: MDPI journal article supplement (doi:10.3390/v15030665), 2023-03-01

**Table S1.** PRISMA 2009 checklist.

| Section/topic                      | #  | Checklist item                                                                                                                                                                                                                                                                                              | Reported on page # |
|------------------------------------|----|-------------------------------------------------------------------------------------------------------------------------------------------------------------------------------------------------------------------------------------------------------------------------------------------------------------|--------------------|
| <b>TITLE</b>                       |    |                                                                                                                                                                                                                                                                                                             |                    |
| Title                              | 1  | Identify the report as a systematic review, meta-analysis, or both.                                                                                                                                                                                                                                         | 01                 |
| <b>ABSTRACT</b>                    |    |                                                                                                                                                                                                                                                                                                             |                    |
| Structured summary                 | 2  | Provide a structured summary including, as applicable: background; objectives; data sources; study eligibility criteria, participants, and interventions; study appraisal and synthesis methods; results; limitations; conclusions and implications of key findings; systematic review registration number. | 01                 |
| <b>INTRODUCTION</b>                |    |                                                                                                                                                                                                                                                                                                             |                    |
| Rationale                          | 3  | Describe the rationale for the review in the context of what is already known.                                                                                                                                                                                                                              | 02-03              |
| Objectives                         | 4  | Provide an explicit statement of questions being addressed with reference to participants, interventions, comparisons, outcomes, and study design (PICOS).                                                                                                                                                  | 04-05              |
| <b>METHODS</b>                     |    |                                                                                                                                                                                                                                                                                                             |                    |
| Protocol and registration          | 5  | Indicate if a review protocol exists, if and where it can be accessed (e.g., Web address), and, if available, provide registration information including registration number.                                                                                                                               | 04                 |
| Eligibility criteria               | 6  | Specify study characteristics (e.g., PICOS, length of follow-up) and report characteristics (e.g., years considered, language, publication status) used as criteria for eligibility, giving rationale.                                                                                                      | 04-05              |
| Information sources                | 7  | Describe all information sources (e.g., databases with dates of coverage, contact with study authors to identify additional studies) in the search and date last searched.                                                                                                                                  | 04                 |
| Search                             | 8  | Present full electronic search strategy for at least one database, including any limits used, such that it could be repeated.                                                                                                                                                                               | 04                 |
| Study selection                    | 9  | State the process for selecting studies (i.e., screening, eligibility, included in systematic review, and, if applicable, included in the meta-analysis).                                                                                                                                                   | 04                 |
| Data collection process            | 10 | Describe method of data extraction from reports (e.g., piloted forms, independently, in duplicate) and any processes for obtaining and confirming data from investigators.                                                                                                                                  | 04-05              |
| Data items                         | 11 | List and define all variables for which data were sought (e.g., PICOS, funding sources) and any assumptions and simplifications made.                                                                                                                                                                       | 04-05              |
| Risk of bias in individual studies | 12 | Describe methods used for assessing risk of bias of individual studies (including specification of whether this was done at the study or outcome level), and how this information is to be used in any data synthesis.                                                                                      | 04-05              |
| Summary measures                   | 13 | State the principal summary measures (e.g., risk ratio, difference in means).                                                                                                                                                                                                                               | 05                 |

|                      |    |                                                                                                                                                           |    |
|----------------------|----|-----------------------------------------------------------------------------------------------------------------------------------------------------------|----|
| Synthesis of results | 14 | Describe the methods of handling data and combining results of studies, if done, including measures of consistency (e.g., $I^2$ ) for each meta-analysis. | 05 |
|----------------------|----|-----------------------------------------------------------------------------------------------------------------------------------------------------------|----|

| Section/topic                 | #  | Checklist item                                                                                                                                                                                           | Reported on page # |
|-------------------------------|----|----------------------------------------------------------------------------------------------------------------------------------------------------------------------------------------------------------|--------------------|
| Risk of bias across studies   | 15 | Specify any assessment of risk of bias that may affect the cumulative evidence (e.g., publication bias, selective reporting within studies).                                                             | 04-05              |
| Additional analyses           | 16 | Describe methods of additional analyses (e.g., sensitivity or subgroup analyses, meta-regression), if done, indicating which were pre-specified.                                                         | 04-05              |
| <b>RESULTS</b>                |    |                                                                                                                                                                                                          |                    |
| Study selection               | 17 | Give numbers of studies screened, assessed for eligibility, and included in the review, with reasons for exclusions at each stage, ideally with a flow diagram.                                          | 05                 |
| Study characteristics         | 18 | For each study, present characteristics for which data were extracted (e.g., study size, PICOS, follow-up period) and provide the citations.                                                             | 05-06              |
| Risk of bias within studies   | 19 | Present data on risk of bias of each study and, if available, any outcome level assessment (see item 12).                                                                                                | 04                 |
| Results of individual studies | 20 | For all outcomes considered (benefits or harms), present, for each study: (a) simple summary data for each intervention group (b) effect estimates and confidence intervals, ideally with a forest plot. | 04-07              |
| Synthesis of results          | 21 | Present results of each meta-analysis done, including confidence intervals and measures of consistency.                                                                                                  | 04-08              |
| Risk of bias across studies   | 22 | Present results of any assessment of risk of bias across studies (see Item 15).                                                                                                                          | 04,08              |
| Additional analysis           | 23 | Give results of additional analyses, if done (e.g., sensitivity or subgroup analyses, meta-regression [see Item 16]).                                                                                    | 04-07              |
| <b>DISCUSSION</b>             |    |                                                                                                                                                                                                          |                    |
| Summary of evidence           | 24 | Summarize the main findings including the strength of evidence for each main outcome; consider their relevance to key groups (e.g., healthcare providers, users, and policy makers).                     | 09-10              |
| Limitations                   | 25 | Discuss limitations at study and outcome level (e.g., risk of bias), and at review-level (e.g., incomplete retrieval of identified research, reporting bias).                                            | 09-10              |
| Conclusions                   | 26 | Provide a general interpretation of the results in the context of other evidence, and implications for future research.                                                                                  | 10                 |
| <b>FUNDING</b>                |    |                                                                                                                                                                                                          |                    |
| Funding                       | 27 | Describe sources of funding for the systematic review and other support (e.g., supply of data); role of funders for the systematic review.                                                               | 10                 |

**Figure S1:** PRISMA 2009 checklist showing guidelines for systematic reviews and meta-analysis.

For more information, visit: [www.prisma-statement.org](http://www.prisma-statement.org).

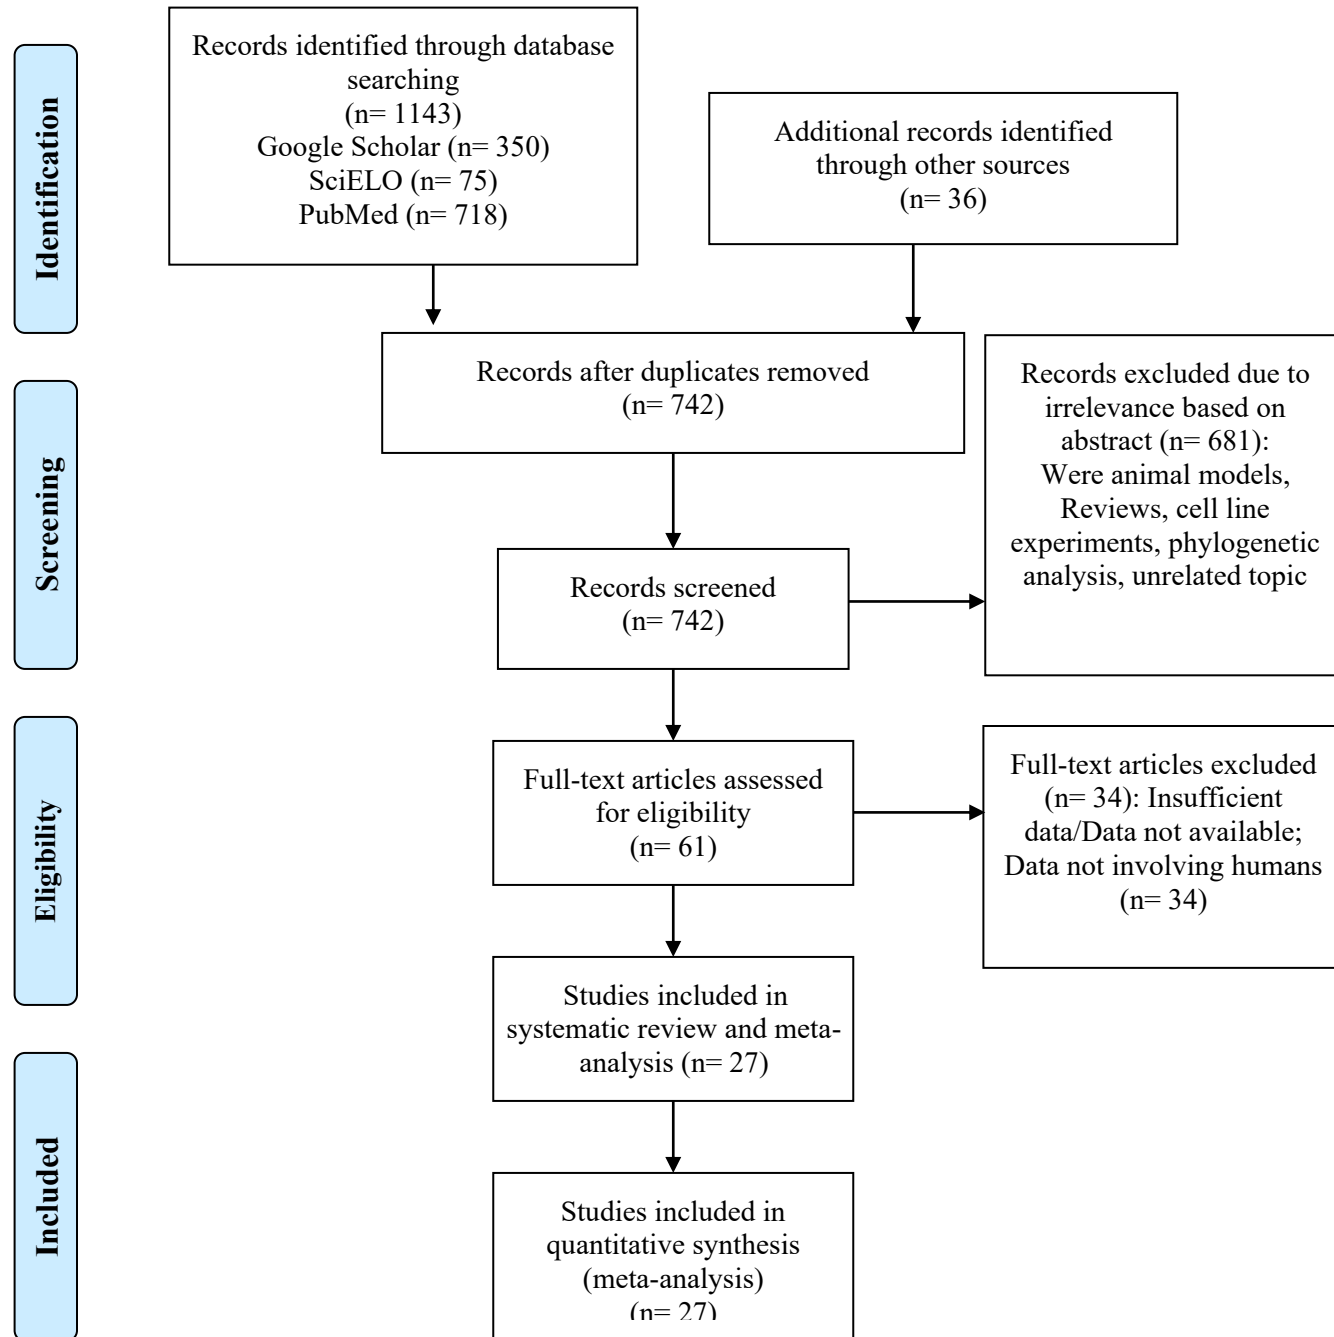

**Table S2.** The characteristics of the studies included in the systematic review and meta-analysis.

|    | ID <sup>1</sup>                                                                                                                                                                                                                    | Biological material collected | Diagnostic method | SARS-CoV negative |           |           |           |         |         | Gender (all patients) | Study period  | Place of study     |
|----|------------------------------------------------------------------------------------------------------------------------------------------------------------------------------------------------------------------------------------|-------------------------------|-------------------|-------------------|-----------|-----------|-----------|---------|---------|-----------------------|---------------|--------------------|
|    |                                                                                                                                                                                                                                    |                               |                   | FluAV POS         | FluAV NEG | FluBV POS | FluBV NEG | RSV POS | RSV NEG |                       |               |                    |
| 1  | Muruganandam, N. et al. 2022. Respiratory viruses among ethnic Nicobarese during COVID-19 pandemic. BMC Infect Dis.                                                                                                                | Nasal/throat swabs            | qPCR              | 51                | 173       | 0         | 0         | 0       | 224     | Female (50.5%)        | Mar-20-Apr-21 | Car-Nicobar, India |
| 2  | Kruger, Or. et al. 2022. Viral viral co-pathogens in COVID-19 acute respiratory syndrome – what did we learn from the first year of pandemic? Int J Infect Dis.                                                                    | Oro-nasopharyngeal swabs      | Multiplex qPCR    | 6                 | 457       | 0         | 476       | 0       | 476     | Female (42.2%)        | Mar-20-Feb-21 | Ramat Gan, Israel  |
| 3  | Schirmer, P. et al. 2021. Respiratory co-infections with COVID-19 in the Veterans Health Administration, 2020. Diagn Microbiol Infect Dis.                                                                                         | -                             | Multiplex qPCR    | 187               | 1022      | 54        | 1022      | 101     | 1022    | Female (13.7%)        | Fev-20-May-21 | Puerto Rico, USA   |
| 4  | Hirotsu, Y. et al. 2020. Analysis of Covid-19 and non-Covid-19 viruses, including influenza viruses, to determine the influence of intensive preventive measures in Japan. J Clin Virol.                                           | Nasopharyngeal swabs          | qPCR              | 0                 | 183       | 0         | 183       | 0       | 183     | -                     | Mar-20-May-20 | Tokyo, Japan       |
| 5  | Hsieh, W.H. et al. 2020. Featuring COVID-19 cases via screening symptomatic patients with epidemiologic link during flu season in a medical center of central Taiwan. J Microbiol Immunol Infect.                                  | Oro-nasopharyngeal swabs      | Nested-qPCR       | 3                 | 38        | 1         | 38        | 2       | 38      | Female (60.4%)        | Jan-20-Feb-20 | Taichung, Taiwan   |
| 6  | Stowe, J. et al. 2021. Interactions between SARS-CoV-2 and influenza, and the impact of coinfection on disease severity: a test-negative design. Int J Epidemiol.                                                                  | -                             | PCR               | 992               | 14755     | -         | -         | -       | -       | Female (49.3%)        | Jan-20-Apr-20 | England            |
| 7  | Akhatar, Z. et al. 2021. SARS-CoV-2 and influenza virus coinfection among patients with severe acute respiratory infection during the first wave of COVID-19 pandemic in Bangladesh: a hospital-based descriptive study. BMJ Open. | Oro-nasopharyngeal swabs      | qPCR              | 175 (FluV)        | 1986      | -         | -         | -       | -       | Female (33.6%)        | Mar-20-Dec-0  | Bangladesh         |
| 8  | Alpaydin, A.O. et al. 2020. Clinical and radiological diagnosis of non-SARS-CoV-2 viruses in the era of COVID-19 pandemic. J Med Virol.                                                                                            | Nasopharyngeal swabs          | Multiplex qPCR    | 0                 | 78        | 0         | 78        | 3       | 78      | Female (48.71%)       | Mar-20        | Turkey             |
| 9  | Babiker, A. et al. 2021. Metagenomic sequencing to detect respiratory viruses in persons under investigation for COVID-19. J Clin Microbiol.                                                                                       | Nasopharyngeal swabs          | Metagenomic NGS   | 3                 | 30        | -         | -         | 2       | 30      | Female (51.6%)        | Feb-20-Apr-20 | Georgia, USA       |
| 10 | Blasco, M.L. et al. 2020. Co-detection of respiratory pathogens in patients hospitalized with Coronavirus viral disease-2019 pneumonia. J Med Virol.                                                                               | Oro-nasopharyngeal swabs      | qRT-PCR           | 1                 | 23        | -         | -         | 1       | 23      | -                     | Mar-20        | Valencia, Spain    |
| 11 | Castillo, E.M. et al. 2020. Rates of coinfection with other respiratory pathogens in patients positive for coronavirus disease 2019 (COVID-19). JACEP Open.                                                                        | Nasal/throat swabs            | RPNA-RT-PCR       | 1                 | 326       | 0         | 326       | 4       | 326     | Female (50.65%)       | Mar-20        | San Diego, USA     |
| 12 | Eisen, A.K.A. et al. 2021. Low circulation of Influenza A and coinfection with SARS-CoV-2 among other respiratory viruses during the COVID-19 pandemic in a region of southern Brazil. J Med Virol.                                | Oro-nasopharyngeal swabs      | qRT-PCR           | 10                | 569       | 0         | 569       | -       | -       | -                     | Mar-20-Dec-20 | Rio Grande do Sul, |
| 13 | Freeman, C.L. et al. 2021. Co-detection of SARS-CoV-2 with secondary respiratory pathogen infections. J Gen Intern Med.                                                                                                            | -                             | Multiplex qPCR    | 46                | 686       | 12        | 686       | 20      | 686     | -                     | Mar-20-Oct-20 | Nashville, USA     |
| 14 | Hazra, A. et al. 2020. Coinfections with SARS-CoV-2 and other respiratory pathogens. Infect Control Hosp Epidemiol.                                                                                                                | Nasopharyngeal swabs          | qRT-PCT/RT-PCR-   | 49                | 2076      | 13        | 2076      | 39      | 2076    | -                     | Mar-20-Apr-21 | Chicago, USA       |
| 15 | Kim, D. et al. 2020. Rates of co-infection between SARS-CoV-2 and other respiratory pathogens. JAMA.                                                                                                                               | Nasopharyngeal swabs          | qRT-PCR           | 29                | 1101      | 8         | 1101      | 32      | 1101    | Female (54.85%)       | Mar-20        | California         |
|    | Marshall, N.C. et al. 2021. Broad respiratory testing to identify                                                                                                                                                                  | -                             | qRT-              | 555               | 51129     | 236       | 51129     | 438     | 51129   | -                     | Mar-20        | Edmonton,          |

|    |                                                                                                                                                                                                                           |                                       |                   |     |       |     |      |    |       |                 |                  |                      |
|----|---------------------------------------------------------------------------------------------------------------------------------------------------------------------------------------------------------------------------|---------------------------------------|-------------------|-----|-------|-----|------|----|-------|-----------------|------------------|----------------------|
| 16 | SARS-CoV-2 viral co-circulation and inform diagnostic stewardship in the COVID-19 pandemic. <i>Viol J.</i>                                                                                                                |                                       | PCR               |     |       |     |      |    |       |                 | May-20           | Canada               |
| 17 | Matos, A.R. et al. 2020. Identification of SARS-CoV-2 and additional respiratory pathogens cases under the investigation of COVID-19 initial phase in a Brazilian reference laboratory. <i>Mem Inst Oswaldo Cruz.</i>     | Nasopharyngeal swabs                  | qRT-PCR           | 165 | 9     | 9   | 165  | 5  | 165   | -               | Feb-20<br>Mar-20 | Brazil               |
| 18 | Nowak, M.D. et al. 2020. Coinfection in SARS-CoV-2 infected patients: where are influenza virus and rhinovirus/enterovirus? <i>J Med Virol.</i>                                                                           | -                                     | Multiplex qRT-PCR | 10  | 845   | 3   | 845  | 13 | 845   | Female (53.96%) | Mar-20<br>Apr-20 | New York, USA        |
| 19 | Schneider, J.G. et al. 2021. Identifying risk factors that distinguish symptomatic severe acute respiratory syndrome coronavirus 2 infection from common upper respiratory infections in children. <i>Cureus.</i>         | Nasopharyngeal swabs                  | qRT-PCR/RT-PCR    | 1   | 243   | 2   | 243  | 10 | 243   | Female (48.16%) | Mar-20<br>May-20 | Indianapolis, USA    |
| 20 | Shah, S.J. et al. 2020. Clinical features, diagnostics, and outcomes of patients presenting with acute respiratory illness: A retrospective cohort study of patients with and without COVID-19. <i>EClinicalMedicine.</i> | Oro-nasopharyngeal swabs              | RT-PCR            | 5   | 194   | 2   | 194  | 3  | 194   | Female (49.46%) | Feb-20<br>Mar-20 | San Francisco, USA   |
| 21 | Singh, V. et al. 2021. SARS-CoV-2 respiratory co-infections: incidence of viral and bacterial co-pathogens. <i>Int J Infect Dis.</i>                                                                                      | Nasal/oropharyngeal, and sputum swabs | qRT-PCR           | 6   | 16363 | -   | -    | 16 | 16363 | Female (55.2%)  | Mar-20<br>Aug-20 | Denton, USA          |
| 22 | Chekuri, S. et al. 2021. SARS-CoV-2 coinfection with additional respiratory virus does not predict severe disease: a retrospective cohort study. <i>J Antimicrob Chemother.</i>                                           | Nasopharyngeal swabs                  | Multiplex qRT-PCR | 8   | 88    | 4   | 88   | 10 | 88    | -               | Mar-20<br>Apr-20 | New York, USA        |
| 23 | Letafati, A. et al. 2022. No human respiratory syncytial virus but SARS-CoV-2 found in children under 5 years old referred to children medical Center in 2021, Tehran, Iran. <i>J Med Virol.</i>                          | Nasopharyngeal swabs                  | qRT-PCR           | -   | -     | -   | -    | 0  | 152   | Female (44%)    | Mar-20<br>May-21 | Tehran, Iran         |
| 24 | Varela, F.H. et al. 2021. Absence of detection of RSV and influenza during the COVID-19 pandemic in a Brazilian cohort: Likely role of lower transmission in the community. <i>J Glob Health.</i>                         | Oro-nasopharyngeal swabs              | qRT-PCR           | 0   | 966   | 0   | 966  | 0  | 966   | Female (58.88%) | May-20<br>Aug-20 | Porto Alegre, Brazil |
| 25 | Boschiero, M.N. et al. 2022. Frequency of respiratory pathogens other than SARS-CoV-2 detected during COVID-19 testing. <i>Diagn Microbiol Infect Dis.</i>                                                                | -                                     | qRT-PCR           | 113 | 2792  | 182 | 4252 | 90 | 2810  | -               | 2020             | São Paulo, Brazil    |
| 26 | Zhang, D.D. et al. 2020. Characterizing coinfection in children with COVID-19: A dual center retrospective analysis. <i>Infect Control Hosp Epidemiol.</i>                                                                | -                                     | Multiplex qRT-PCR | 4   | 666   | 12  | 666  | 25 | 666   | -               | Mar-20<br>Apr-20 | Chicago, USA         |
| 27 | Chung, H.Y. et al. 2021. Novel dual multiplex real-time RT-PCR assays for the rapid detection of SARS-CoV-2, influenza A/B, and respiratory syncytial virus using the BD MAX open system. <i>Emerg Infect Dis.</i>        | Nasopharyngeal swabs                  | Multiplex qRT-PCR | 19  | 150   | 5   | 150  | 2  | 150   | Female (49.26%) | Feb-20<br>Aug-20 | Taipei, Taiwan       |

<sup>1</sup>ID: Identification of the study;

**Table S3.** Methodologic quality of cohort and case-control studies included in the meta-analysis.

Methodologic quality of cohort studies included in the meta-analysis (NOS)

The “star” presents a “high-quality” choice of individual study. For high-quality study was defined as a study with  $\geq 4$  awarded stars.

Methodologic quality of case-control studies included in the meta-analysis (Newcastle-Ottawa scale (NOS))

| Study and year                  | Representa-<br>tiveness of cases | Selection of<br>non-exposed | Ascertainment of<br>exposure | Demonstration<br>outcome | Assessment of<br>outcome | Follow-up outcomes | Adequacy of<br>follow-up | Total quality<br>scores |
|---------------------------------|----------------------------------|-----------------------------|------------------------------|--------------------------|--------------------------|--------------------|--------------------------|-------------------------|
| Muruganandam, N. et al.<br>2022 | ☆                                | ☆                           | -                            | ☆                        | ☆                        | -                  | -                        | 4                       |
| Kruger, Or. et al. 2022         | ☆                                | ☆                           |                              | ☆                        | ☆                        |                    | -                        | 4                       |
| Schirmer, P. et al. 2021        | ☆                                | ☆                           | -                            | ☆                        | ☆                        | -                  | -                        | 4                       |
| Hirotsu, Y. et al. 2020         | ☆                                | ☆                           | -                            | ☆                        | ☆                        | -                  | -                        | 4                       |
| Hsieh, W.H. et al. 2020         | ☆                                | ☆                           | -                            | ☆                        | ☆                        |                    | -                        | 4                       |
| Stowe, J. et al. 2021           | ☆                                | ☆                           | -                            | ☆                        | ☆                        | -                  | -                        | 4                       |
| Akhatar, Z. et al. 2021         | ☆                                | ☆                           | -                            | ☆                        | ☆                        | -                  | -                        | 4                       |
| Alpaydin, A.O. et al. 2020      | ☆                                | ☆                           | -                            | ☆                        | ☆                        | -                  | -                        | 4                       |
| Babiker, A. et al. 2021         | ☆                                | ☆                           | -                            | ☆                        | ☆                        |                    | -                        | 4                       |
| Blasco, M.L. et al. 2020        | ☆                                | ☆                           | -                            | ☆                        | ☆                        | -                  | -                        | 4                       |
| Castillo, E.M. et al. 2020      | ☆                                | ☆                           | -                            | ☆                        | ☆                        | -                  | -                        | 4                       |
| Eisen, A.K.A. et al. 2021       | ☆                                | ☆                           | -                            | ☆                        | ☆                        | -                  | -                        | 4                       |
| Freeman, C.L. et al. 2021       | ☆                                | ☆                           | -                            | ☆                        | ☆                        | -                  | -                        | 4                       |
| Hazra, A. et al. 2020           | ☆                                | ☆                           | -                            | ☆                        | ☆                        | -                  | -                        | 4                       |
| Kim, D. et al. 2020             | ☆                                | ☆                           | -                            | ☆                        | ☆                        | -                  | -                        | 4                       |
| Marshall, N.C. et al. 2021      | ☆                                | ☆                           |                              | ☆                        | ☆                        |                    | -                        | 4                       |
| Matos, A.R. et al. 2020         | ☆                                | ☆                           | -                            | ☆                        | ☆                        | -                  | -                        | 4                       |
| Nowak, M.D. et al. 2020         | ☆                                | ☆                           | -                            | ☆                        | ☆                        | -                  | -                        | 4                       |
| Schneider, J.G. et al. 2021     | ☆                                | ☆                           | -                            | ☆                        | ☆                        |                    | -                        | 4                       |
| Shah, S.J. et al. 2020          | ☆                                | ☆                           | -                            | ☆                        | ☆                        | -                  | -                        | 4                       |
| Singh, V. et al. 2021           | ☆                                | ☆                           | -                            | ☆                        | ☆                        | -                  | -                        | 4                       |
| Chekuri, S. et al. 2021         | ☆                                | ☆                           | -                            | ☆                        | ☆                        | -                  | -                        | 4                       |
| Letafati, A. et al. 2022        | ☆                                | ☆                           | -                            | ☆                        | ☆                        | -                  | -                        | 4                       |
| Varela, F.H. et al. 2021        | ☆                                | ☆                           | -                            | ☆                        | ☆                        | -                  | -                        | 4                       |
| Boschiero, M.N. et al. 2022     | ☆                                | ☆                           | -                            | ☆                        | ☆                        | -                  | -                        | 4                       |
| Zhang, D.D. et al. 2020         | ☆                                | ☆                           | -                            | ☆                        | ☆                        | -                  | -                        | 4                       |
| Chung, H.Y. et al. 2021         | ☆                                | ☆                           | -                            | ☆                        | ☆                        | -                  | -                        | 4                       |

**Figure S2.** Forest plot containing positivity according to FluV and RSV subtypes.

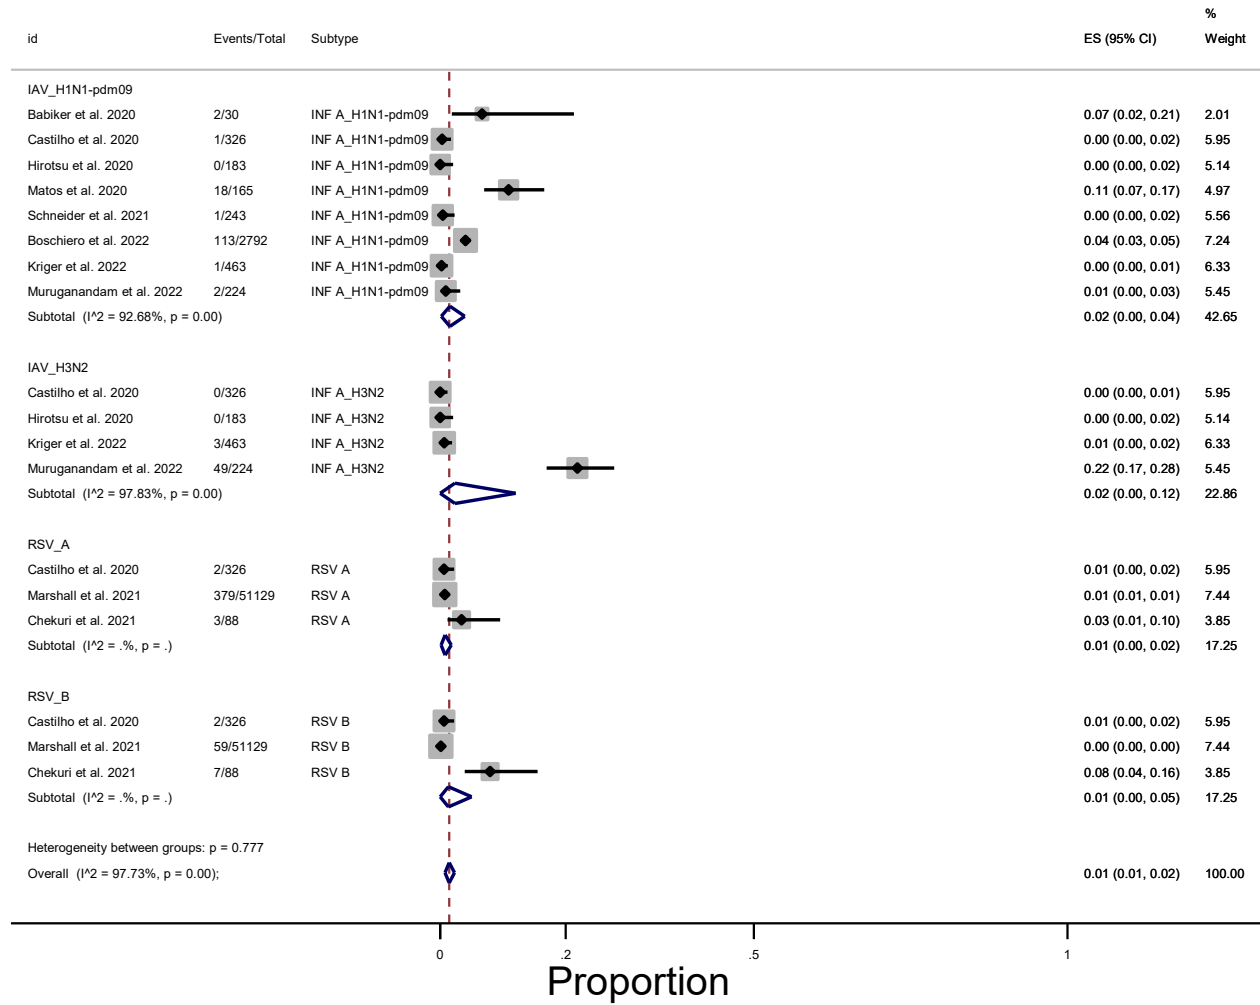

**Figure S3.** FluV in relation to the year of collection of biological samples.

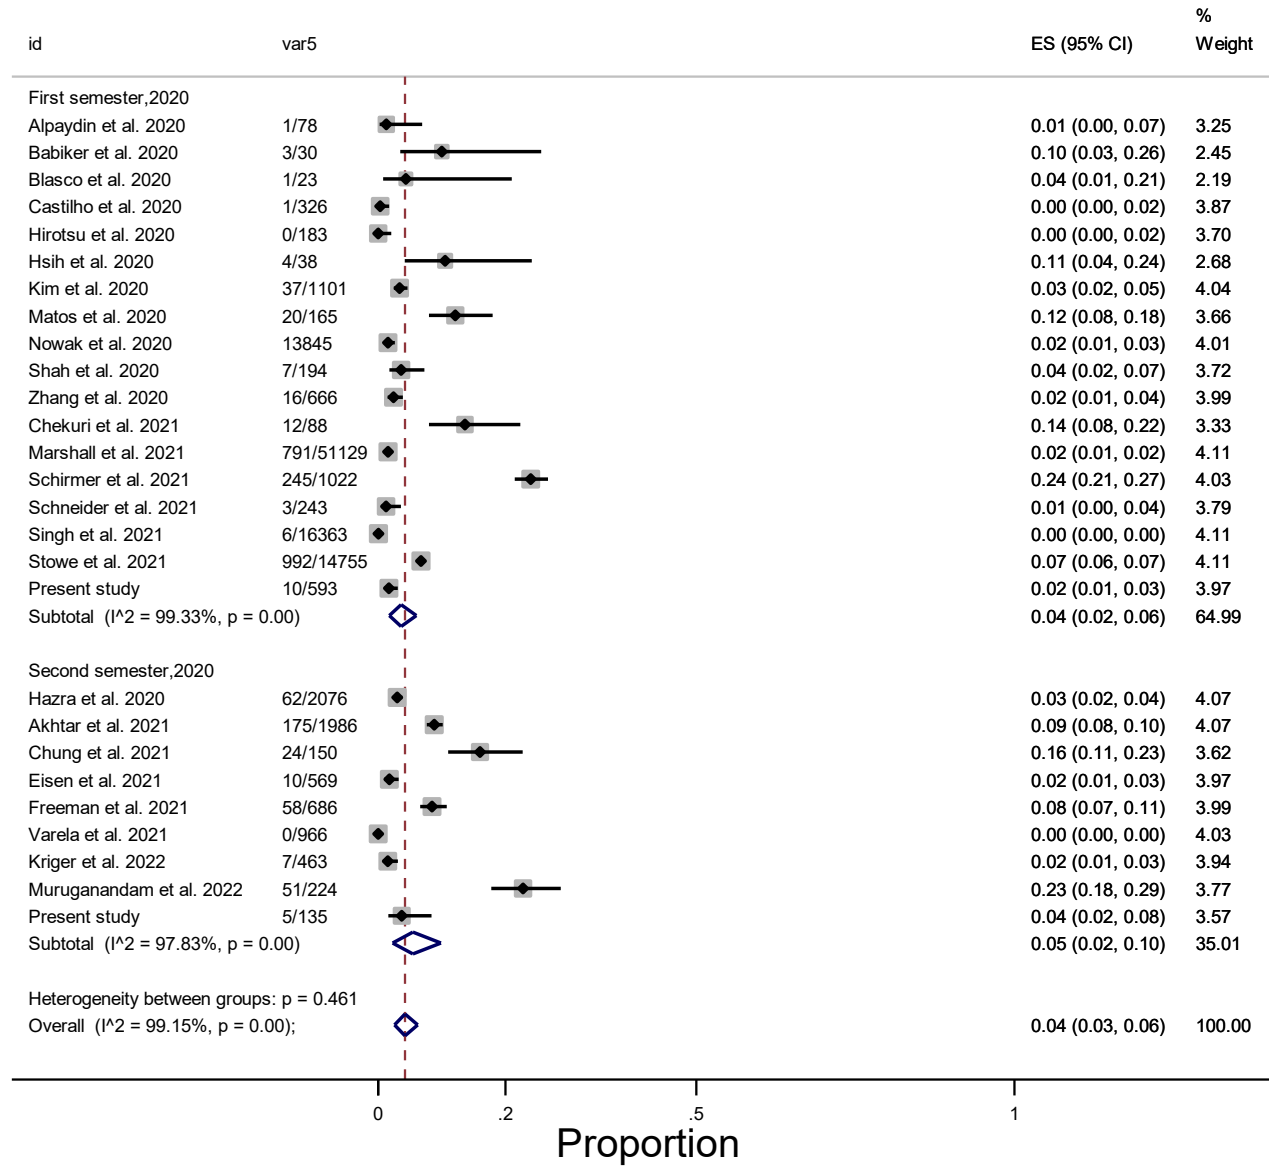



**Figure S4.** RSV positivity in relation to the year of collection of biological samples.

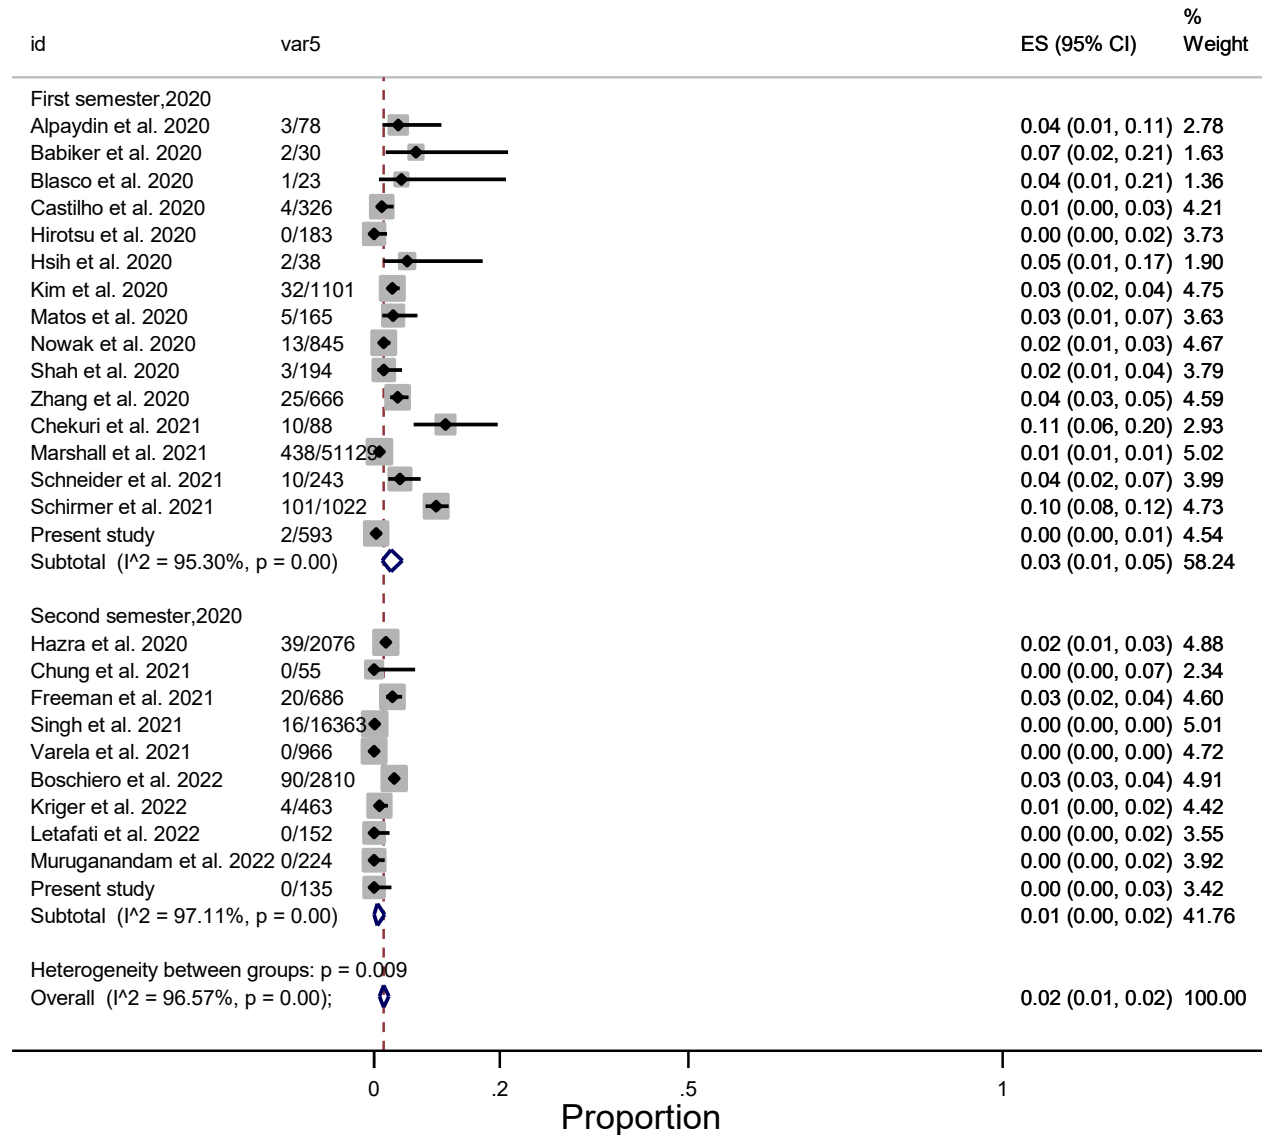

**Figure S5.** Funnel plot for FluV positivity among SCNG.

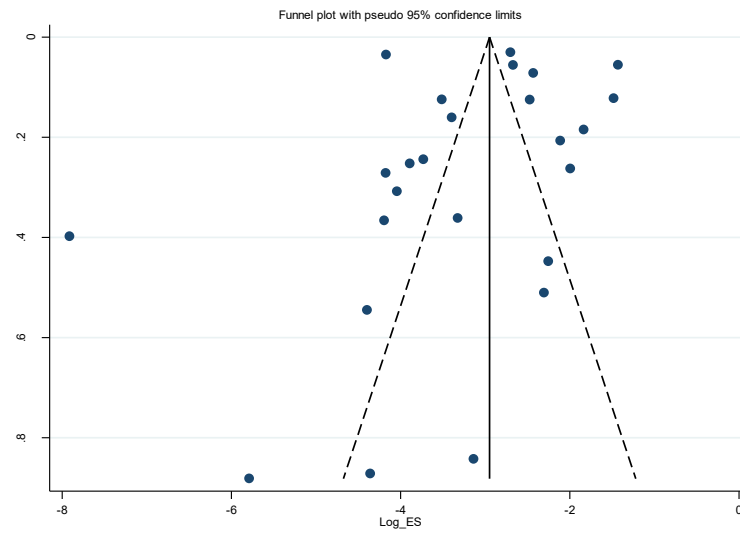

**Figure S6.** Funnel plot for FluAV positivity among SCNG

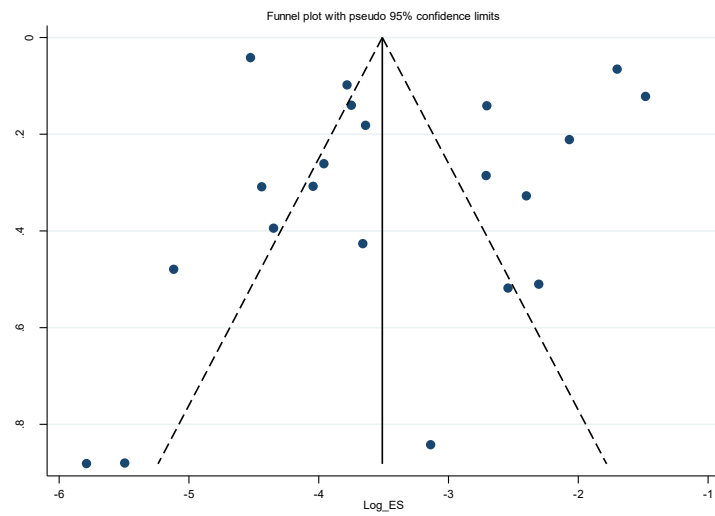

**Figure S7.** Funnel plot for FluBV positivity among SCNG.

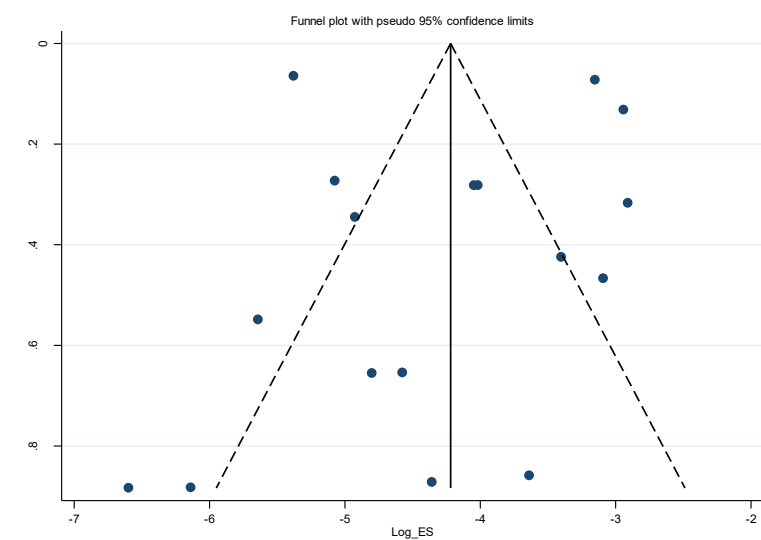

**Figure S8.** Sensitivity analysis for the effect of removing one study at a time on the overall estimation of FluV positivity in SCNG.

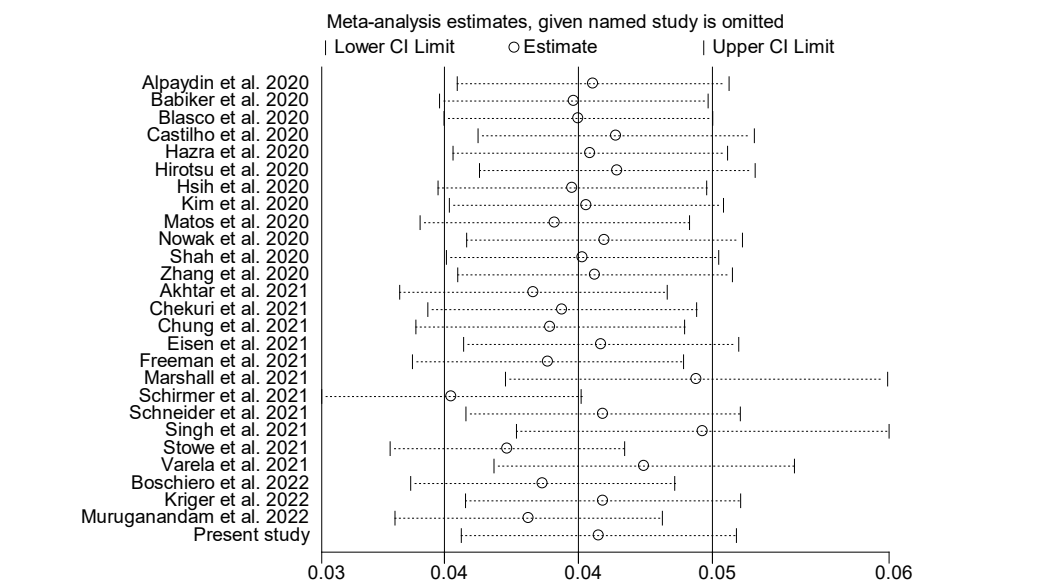

**Figure S9.** Sensitivity analysis for the effect of removing one study at a time on the overall estimation of FluAV positivity in SCNG.

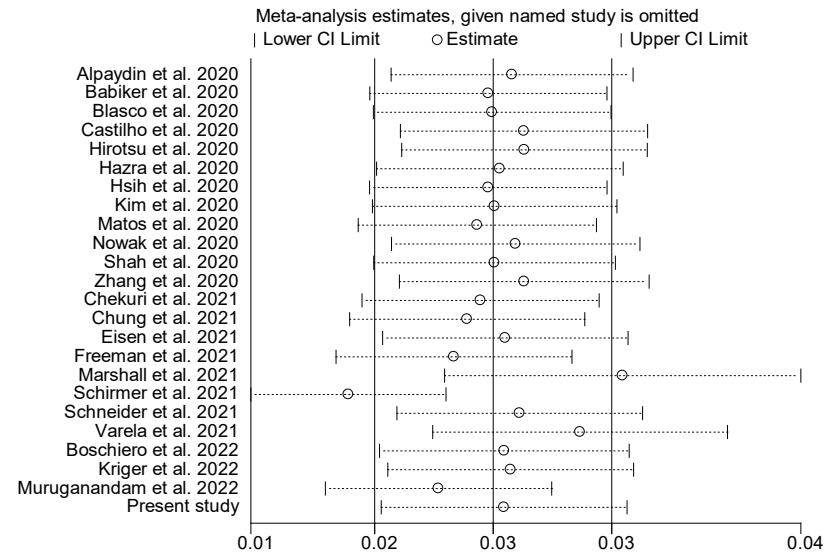

**Figure S10.** Sensitivity analysis for the effect of removing one study at a time on the overall estimation of FluBV positivity in SCNG.

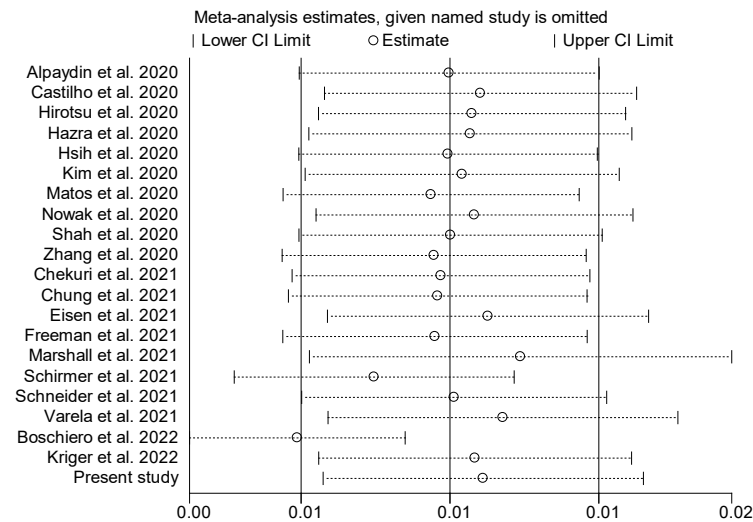

Supplement: s1 [file s1]
